# Supplementary material for: Alternative splicing of CARM1 regulated by LincGET-guided paraspeckles biases the first cell fate in mammalian early embryos
Source: PubMed Central journal article supplement (PMC11402786; doi:10.1038/s41594-024-01292-9), 2024-04-24

# Unmodified Gels Extended Data Fig. 4

**b**

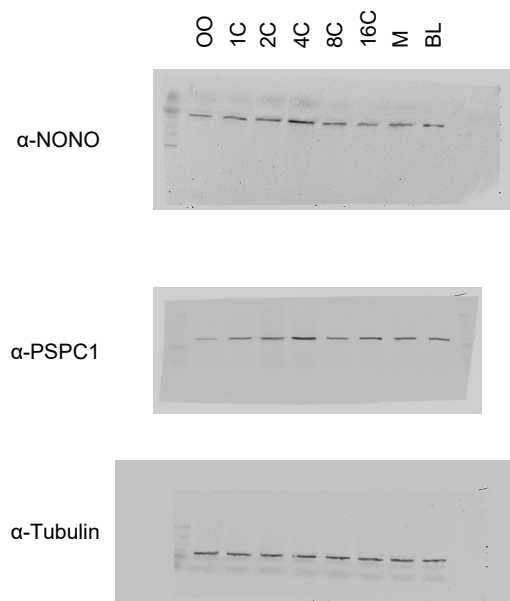

Supplement: 41594_2024_1292_MOESM22_ESM.pdf [file 41594_2024_1292_MOESM22_ESM.pdf]
