# Supplementary material for: Alternative splicing of CARM1 regulated by LincGET-guided paraspeckles biases the first cell fate in mammalian early embryos
Source: PubMed Central journal article supplement (PMC11402786; doi:10.1038/s41594-024-01292-9), 2024-04-24
Supplement: 41594_2024_1292_MOESM30_ESM.pdf [file 41594_2024_1292_MOESM30_ESM.pdf]

# Unmodified Gels Extended Data Fig. 9

**b**

2C

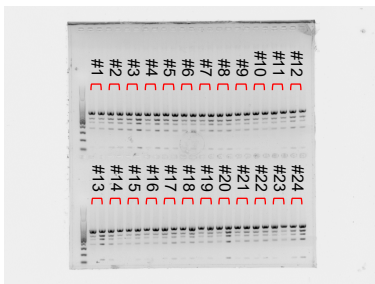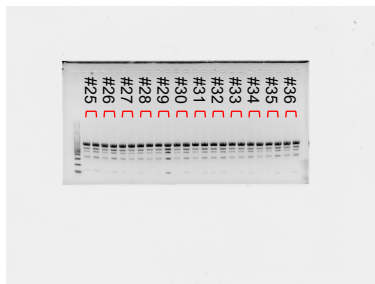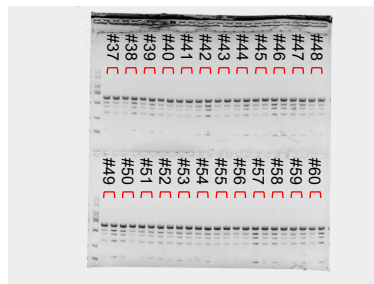

E3S  
E5S  
E6S  
E56S  
E3456S

**c**

4C

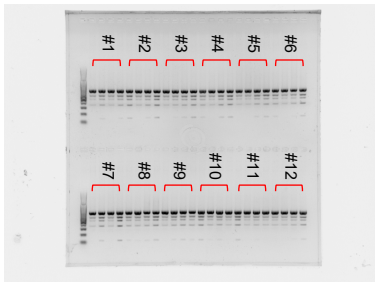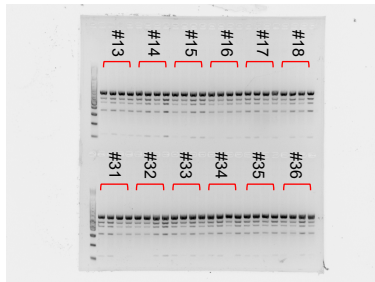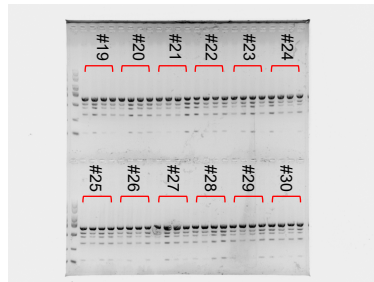

E3S  
E5S  
E6S  
E56S  
E3456S

4C

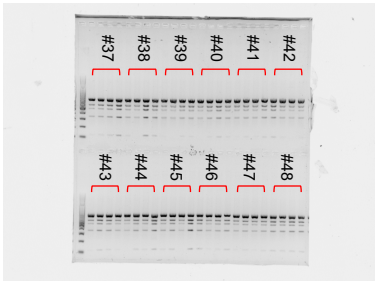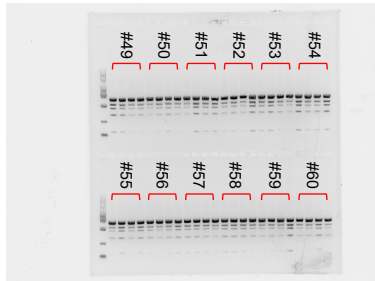

E3S  
E5S  
E6S  
E56S  
E3456S
